# Supplementary material for: Biological Activities of Ceratonia siliqua Pod and Seed Extracts: A Comparative Analysis of Two Cretan Cultivars
Source: MDPI journal article supplement (doi:10.3390/ijms241512104), 2023-07-28
Supplement: s1 [file s1]

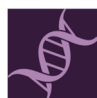

Article

# Biological Activities of *Ceratonia siliqua* Pod and Seed Extracts: A Comparative Analysis of Two Cretan Cultivars

Dafni-Alexandra Kavvoura <sup>1</sup>, Michalis K. Stefanakis <sup>2</sup>, Dimitris Kletsas <sup>1</sup>, Haralambos E. Katerinopoulos <sup>2</sup> and Harris Pratsinis <sup>1,\*</sup>

<sup>1</sup> Laboratory of Cell Proliferation and Ageing, Institute of Biosciences and Applications, NCSR “Demokritos”, 15341 Athens, Greece; dafnikavvoura@gmail.com (D.-A.K.); dkletsas@bio.demokritos.gr (D.K.)

<sup>2</sup> Laboratory of Organic Chemistry, Department of Chemistry, University of Crete, 70013 Heraklion, Greece; michstefanakis@yahoo.gr (M.K.S.); katerinc@uoc.gr (H.E.K.)

\* Correspondence: hprats@bio.demokritos.gr; Tel.: +30-2106503572 or +30-2106503561

## Supplementary information

Table S1. Cell viability following a 24-hour incubation with carob samples.

| Cultivar (Area)      | Sample | Cell Lines (MTT Assay)              |                               |                                  |                               |                                  |
|----------------------|--------|-------------------------------------|-------------------------------|----------------------------------|-------------------------------|----------------------------------|
|                      |        | Normal Cells                        |                               | Cancer Cells                     |                               |                                  |
|                      |        | AG01523                             | A431                          | HT-1080                          |                               |                                  |
|                      |        | Highest Non-Cyto-toxic Dose (µg/mL) | IC <sub>50</sub> ± SD (µg/mL) | Maximal Degree of Inhibition (%) | IC <sub>50</sub> ± SD (µg/mL) | Maximal Degree of Inhibition (%) |
| Imera (Elounda)      | CSE1   | 200                                 | >200                          | N/A                              | >200                          | N/A                              |
|                      | CSE2   | 200                                 | >200                          | N/A                              | >200                          | N/A                              |
|                      | CSE3   | 200                                 | >200                          | 37 ± 31                          | >200                          | N/A                              |
| Tylliria (Heraklion) | CSH1   | 200                                 | >200                          | N/A                              | >200                          | N/A                              |
|                      | CSH2   | 200                                 | >200                          | N/A                              | >200                          | N/A                              |
|                      | CSH3   | 200                                 | >200                          | N/A                              | >200                          | N/A                              |

Highest non-cytotoxic doses of carob samples tested on normal fibroblasts. Half maximal inhibitory concentration (IC<sub>50</sub>) values ± standard deviation (SD) (µg/mL) and maximal degree of inhibition percentages against cancer cell lines<sup>a</sup>.

N/A; non-active, indicating that the sample exhibited no inhibitory effect at the highest concentration tested (200 µg/mL).

The results are expressed as mean ± SD of three independent experiments, conducted in quadruplicates. Dimethylsulfoxide (DMSO)-treated cells served as controls.

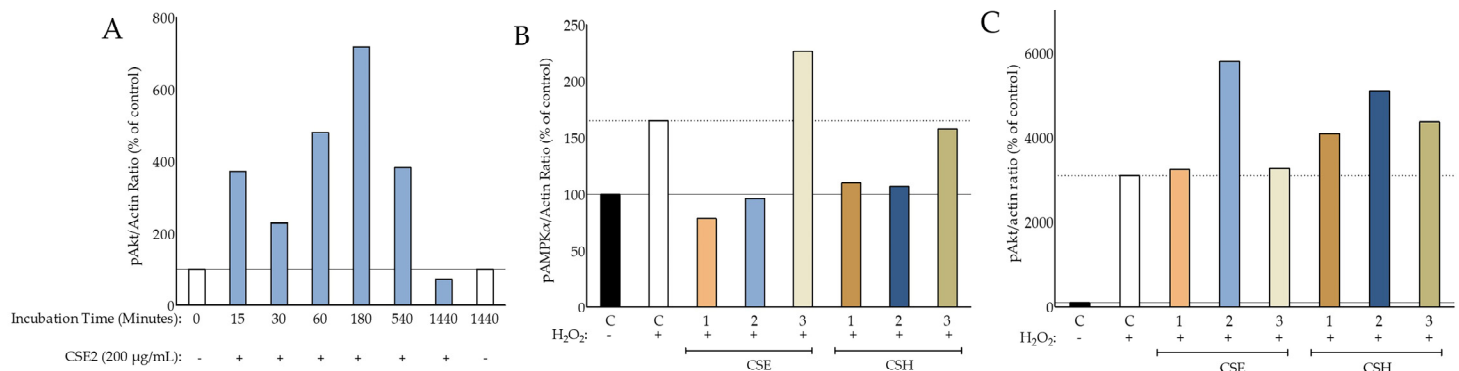

**Figure S1. Western blot analysis of carob extracts; illustration of densitometry results.** (A) Akt phosphorylation upon incubation with CSE2. (B) Effects of pre-treatment of 180 minutes with carob extracts on AMPKα phosphorylation of fibroblast treated with H<sub>2</sub>O<sub>2</sub> (800 μM) for 45 minutes. (C) Effects of pre-treatment of 180 minutes with carob extracts on Akt phosphorylation of fibroblast treated with H<sub>2</sub>O<sub>2</sub> (800 μM) for 45 minutes. Densitometry was performed using ImageJ 1.54b.

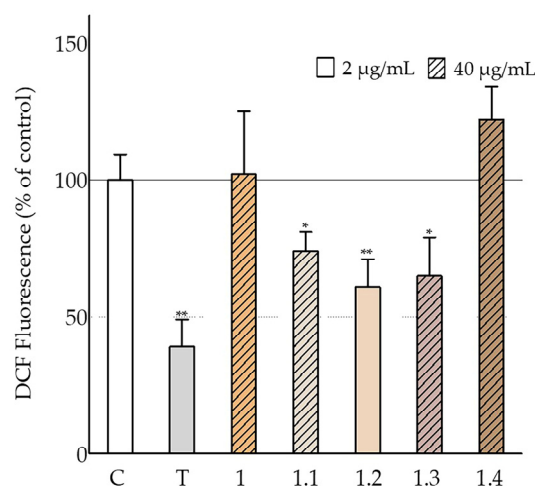

**Figure S2. Intracellular (AG01523) antioxidant activity of CSE1 fractions, at lower concentrations, on basal ROS levels, 210 minutes after DCFH-DA addition (n=3).** DMSO-treated cells served as controls (C) and Trolox (T) as the reference compound. Bars represent mean values ± SD. \* p<0.05; \*\* p<0.01 (Student's t-test). Control values were set to 100%.

Table S2. Effects of carob fractions on normal and cancer cell viability.

| Cultivar (Area) | Sample | Cell Lines (MTT Assay)                       |                                  |                                        |                                  |                                        |
|-----------------|--------|----------------------------------------------|----------------------------------|----------------------------------------|----------------------------------|----------------------------------------|
|                 |        | Normal Cells                                 |                                  | Cancer Cells                           |                                  |                                        |
|                 |        | AG01523                                      | A431                             | HT-1080                                |                                  |                                        |
|                 |        | Highest<br>Non-<br>Cytotoxic<br>Dose (µg/mL) | IC <sub>50</sub> ± SD<br>(µg/mL) | Maximal<br>Degree of<br>Inhibition (%) | IC <sub>50</sub> ± SD<br>(µg/mL) | Maximal<br>Degree of<br>Inhibition (%) |
| Imera (Elounda) | CSE1.1 | 200                                          | 96 ± 1                           | 95 ± 0                                 | 87 ± 18                          | 98 ± 0                                 |
|                 | CSE1.2 | 10                                           | 28 ± 6                           | 90 ± 5                                 | 31 ± 9                           | 97 ± 2                                 |
|                 | CSE1.3 | 200                                          | >200                             | N/A                                    | 135 ± 36                         | 67 ± 15                                |
|                 | CSE1.4 | 200                                          | >200                             | N/A                                    | >200                             | N/A                                    |
|                 | CSE2.1 | 40                                           | 62 ± 28                          | 94 ± 4                                 | 90 ± 6                           | 99 ± 2                                 |
|                 | CSE2.2 | 200 <sup>2</sup> , 40 <sup>3</sup>           | >200                             | 41 ± 12                                | 114 ± 28                         | 76 ± 13                                |
|                 | CSE2.3 | 200                                          | >200                             | N/A                                    | >200                             | 21 ± 5                                 |
|                 | CSE2.4 | 200                                          | >200                             | N/A                                    | >200                             | N/A                                    |

Highest non-cytotoxic doses of carob samples tested on normal fibroblasts. Half maximal inhibitory concentration (IC<sub>50</sub>) values ± standard deviation (SD) (µg/mL) and maximal degree of inhibition percentages against cancer cell lines<sup>1</sup>.

N/A; non-active, indicating that the sample exhibited no inhibitory effect at the highest concentration tested (200 µg/mL).

<sup>1</sup> The results are expressed as mean values ± SD of three independent experiments, conducted in quadruplicates.

<sup>2</sup> Highest cytotoxic concentration in normal serum conditions.

<sup>3</sup> Maximal non-cytotoxic dose in serum-free and low serum conditions.

**Table S3.** *C. siliqua*, from Imera cultivar (Elounda), 30% aqueous methanolic leaf extract activities (CSE4).

| Cell Viability                                                       |           |                                             |                                           |                                           |
|----------------------------------------------------------------------|-----------|---------------------------------------------|-------------------------------------------|-------------------------------------------|
|                                                                      | Cell Line | Highest<br>Non-Cytotoxic<br>Dose<br>(µg/mL) | IC <sub>50</sub> ± SD<br>(µg/mL)          | Maximal<br>Degree of<br>Inhibition<br>(%) |
| MTT Absorbance                                                       | AG01523   | 200                                         |                                           |                                           |
|                                                                      | A431      |                                             | >200                                      | 41 ± 4                                    |
|                                                                      | HT-1080   |                                             | 108 ± 11                                  | 75 ± 8                                    |
| Antioxidant Activity                                                 |           |                                             |                                           |                                           |
|                                                                      | Cell Line | Concentration<br>(µg/mL)                    | Maximal Activity<br>(% of Control)        |                                           |
| DPPH Absorbance                                                      |           | 100                                         | 37 ± 7                                    |                                           |
| Intracellular ROS Levels/DCFH-DA Fluorescence                        |           | N/D                                         | N/D                                       |                                           |
| Intracellular Glutathione Levels/MCB Fluorescence                    | AG01523   | 200                                         | 193 ± 38 (Hypoxia),<br>126 ± 3 (Normoxia) |                                           |
| Photoprotective Activity                                             |           |                                             |                                           |                                           |
|                                                                      | Cell Line |                                             |                                           |                                           |
| UVB Protection/Neutral Red Fluorescence                              | AG01523   | N/A                                         |                                           |                                           |
| SPF                                                                  |           | 32.44                                       |                                           |                                           |
| Inhibition of Tyrosinase, Collagenase and AGEs Formation (200 µg/mL) |           |                                             |                                           |                                           |
| Tyrosinase Inhibition (%)                                            | 53 ± 0    |                                             |                                           |                                           |
| Collagenase Activity (%)                                             | 61 ± 3    |                                             |                                           |                                           |
| AGEs Formation Inhibition (%)                                        | 89 ± 2    |                                             |                                           |                                           |

N/A; non-active; N/D; not determined.
